# Supplementary material
Source: PubMed Central journal article supplement (PMC4198524)
Supplement: NIHMS584103-supplement-01.pdf [file NIHMS584103-supplement-01.pdf]

*Supplemental Table 1: Treatment of Femur fractures*

| Treatment, N (%)                                     | Obese<br>(N=68) <sup>a</sup> | Non-obese<br>(N=198) | P-value <sup>b</sup> |
|------------------------------------------------------|------------------------------|----------------------|----------------------|
| Cast                                                 | 7 (10)                       | 42 (21)              | 0.1217               |
| Flexible nails<br>number requiring open<br>reduction | 23 (34)<br>5                 | 92 (46)<br>17        | 0.1096               |
| Locked nail                                          | 18 (26)                      | 25 (13)              | <b>0.0140</b>        |
| External fixation                                    | 8 (12)                       | 10 (5)               | 0.0961               |
| Plate                                                | 5 (7)                        | 13 (7)               | 0.8278               |
| Closed or open reduction with<br>pins or screws      | 6 (9)                        | 16 (8)               | 0.9591               |

<sup>a</sup> One fracture treated with arthroscopic fixation

<sup>b</sup> Chi-square test

***Supplemental Table 2: Crude and Adjusted Risk Ratios and 95% CIs for overweight (BMI>85<sup>th</sup>) and physeal fracture by long bone type***

|                        | <b>RR (95% CI)</b> | <b>Adjusted RR (95% CI)</b> | <b>P-value</b> |
|------------------------|--------------------|-----------------------------|----------------|
| <b>Long bone type</b>  |                    |                             |                |
| <b>Femur</b>           | 2.16 (0.90-5.19)   | 2.37 (0.89-6.32)            | 0.0851         |
| <b>Tibia</b>           | 1.32 (0.65-2.67)   | 1.60 (0.80-3.22)            | 0.1837         |
| <b>Combined</b>        | 1.68 (0.96-2.94)   | 1.82 (1.02-3.26)            | <b>0.0417</b>  |
| <b>Proximal-distal</b> |                    |                             |                |
| <b>Femur</b>           | 2.02 (1.00-4.08)   | 1.90 (0.94-3.84)            | 0.0737         |
| <b>Tibia</b>           | 1.06 (0.57-1.95)   | 1.22 (0.73-2.06)            | 0.1007         |
| <b>Combined</b>        | 1.39 (0.87-2.22)   | 1.59 (1.00-2.52)            | 0.0503         |

\*Physeal includes all epiphyseal fractures with the exception of ligament avulsions and tibial spine fractures

Adjusted model includes age, and ISS
